# Supplementary material for: Suppression of HBV replication by the expression of nickase- and nuclease dead-Cas9
Source: PubMed Central journal article supplement (PMC5522428; doi:10.1038/s41598-017-05905-w), 2017-07-21
Supplement: 41598_2017_5905_MOESM1_ESM.pdf [file 41598_2017_5905_MOESM1_ESM.pdf]

# **Suppression of HBV replication by the expression of nicase- and nuclease dead Cas9**

**Takeshi Kurihara, Takasuke Fukuhara, Chikako Ono, Satomi Yamamoto, Kentaro Uemura, Toru Okamoto, Masaya Sugiyama, Daisuke Motooka, Shota Nakamura, Masato Ikawa, Masashi Mizokami, Yoshihiko Maehara, and Yoshiharu Matsuura.**

**full-length blots for Fig. 2A, 3A, 4A**

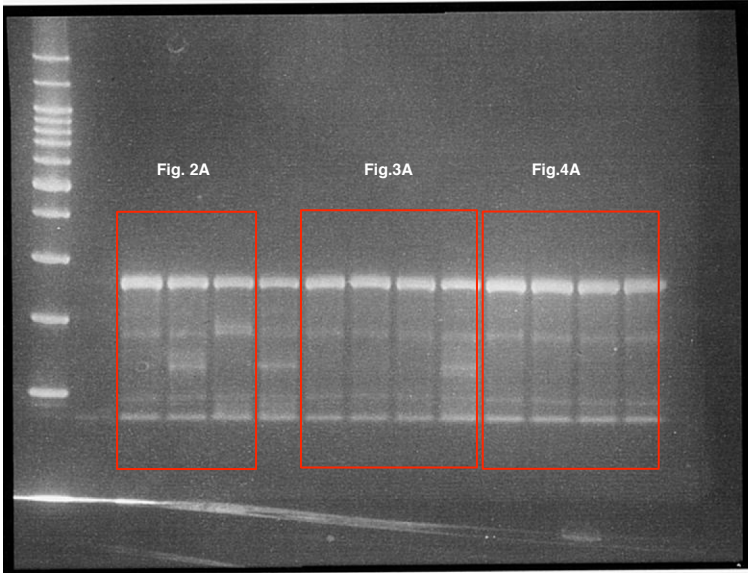

**Supplementary Figure**  
**The full-length blots for Figure 2A, 3A, 4A**  
Dashed line boxes indicate the cropped images used in Fig. 2A, 3A, 4A.

full-length blots for Fig. 2B

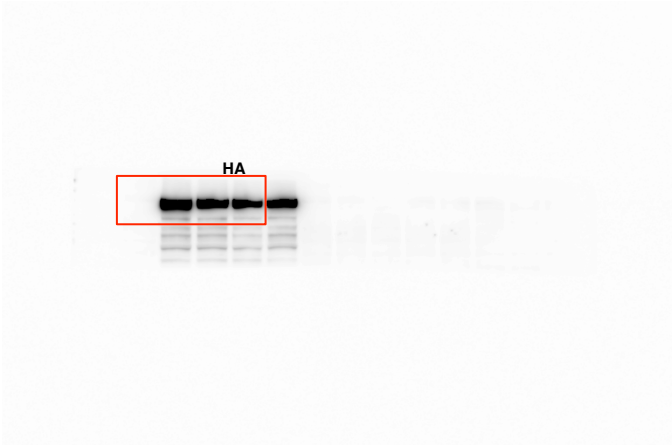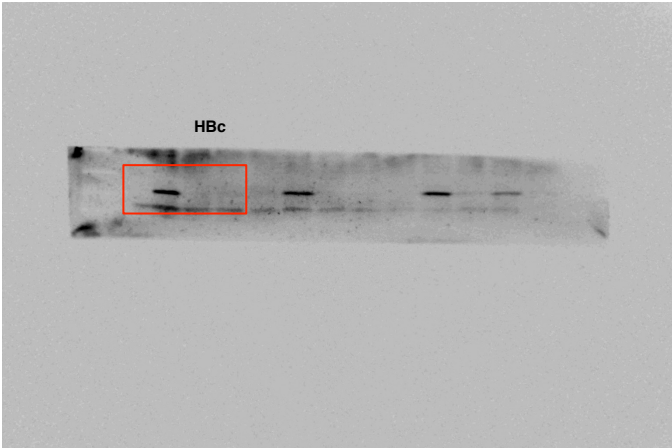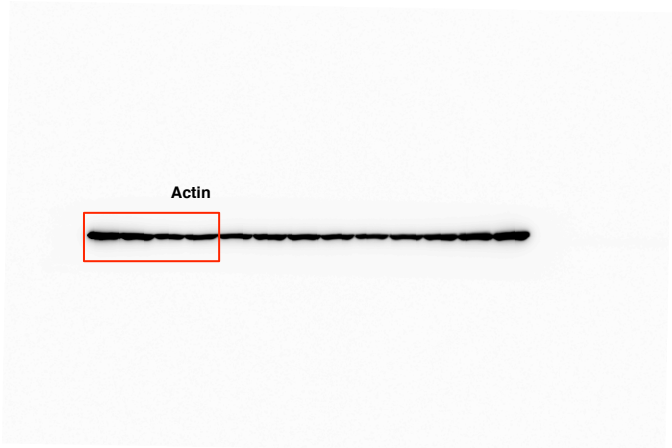

full-length blots for Fig. 2C

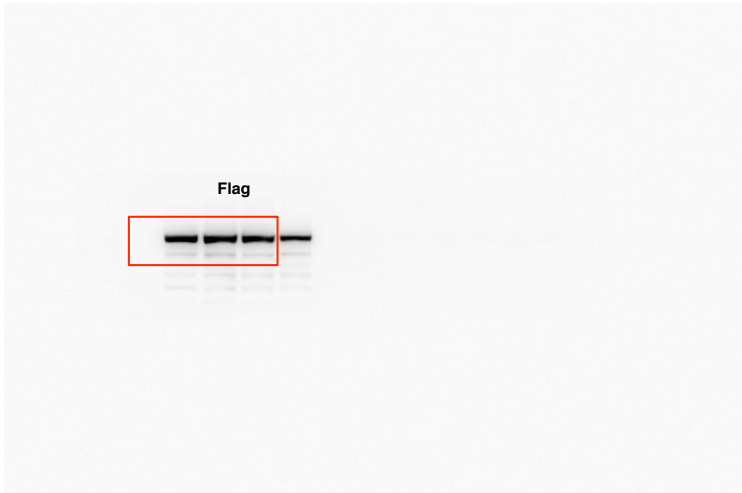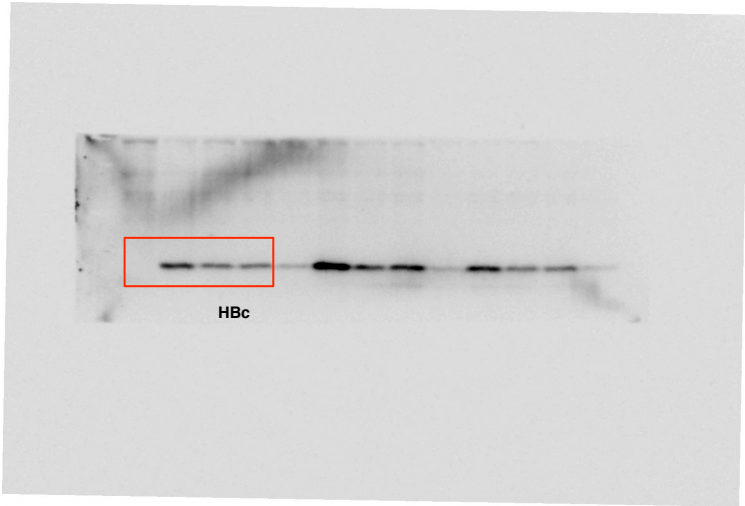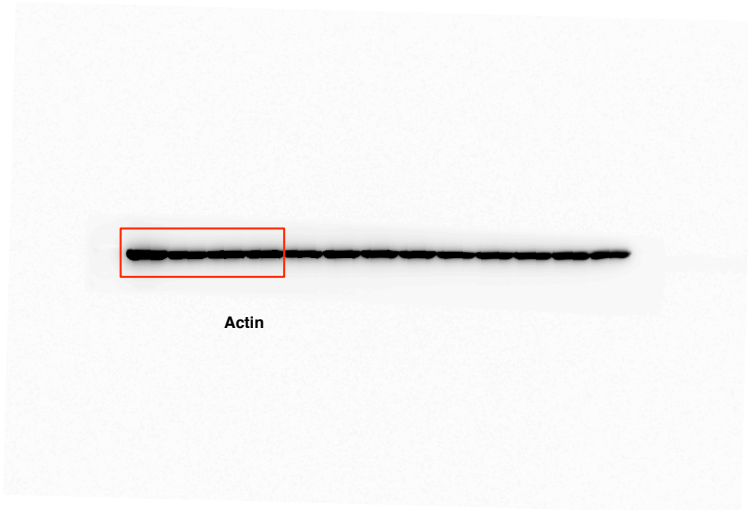

full-length blots for. Fig. 2D

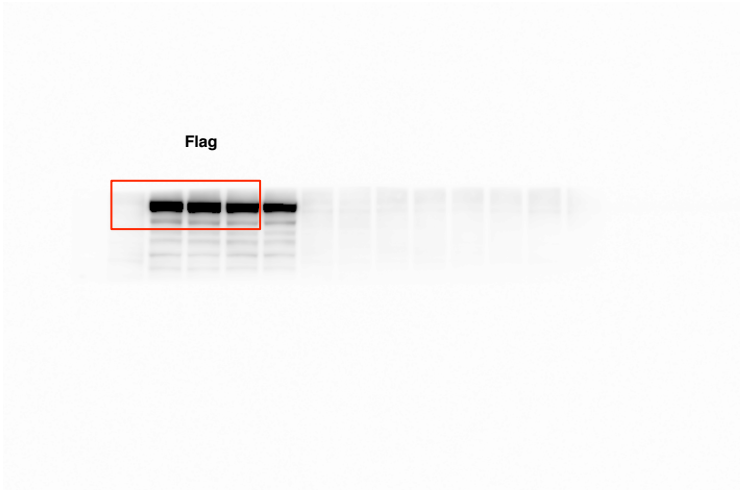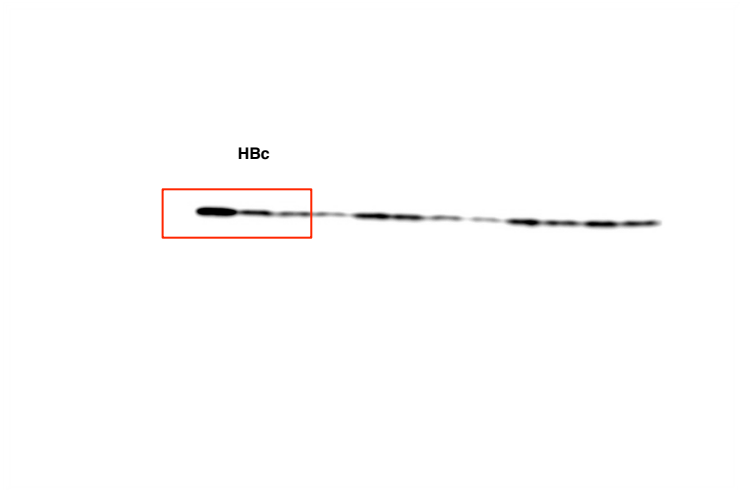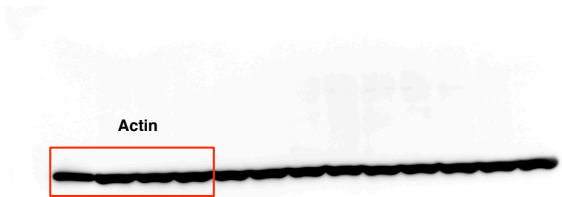

full-length blots for Fig. 3B

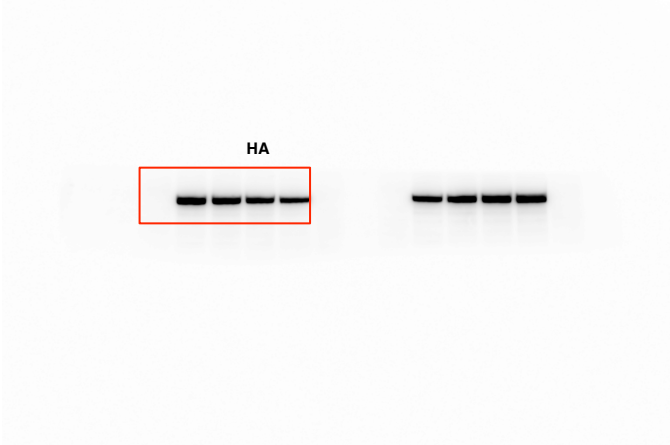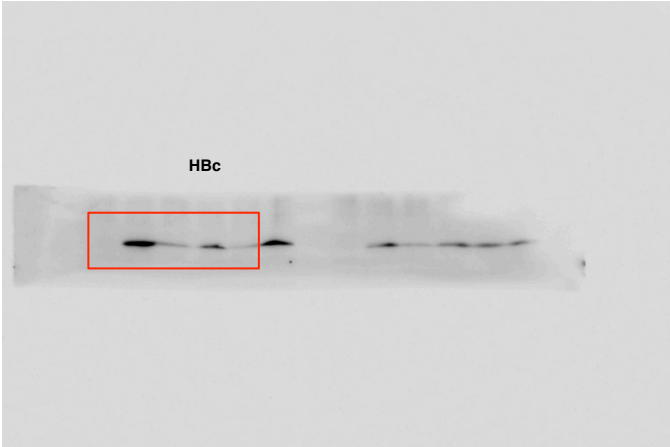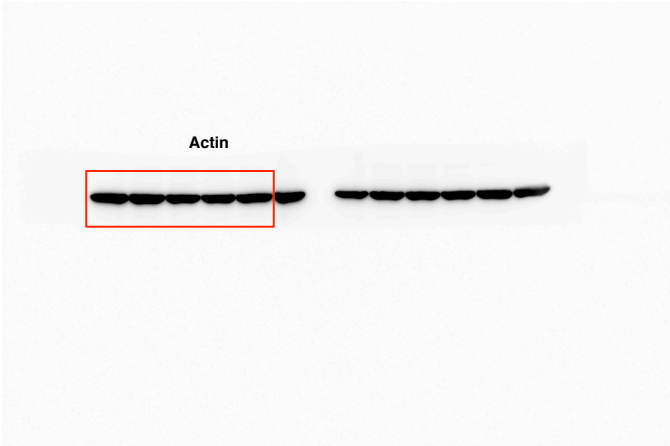

full-length blots for 3C

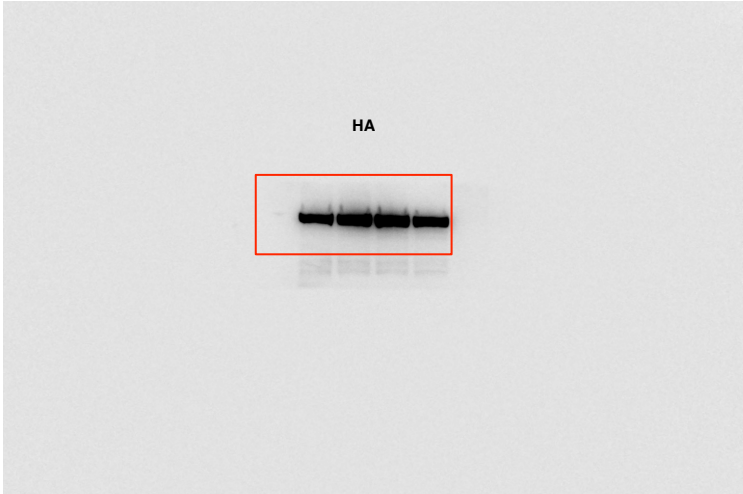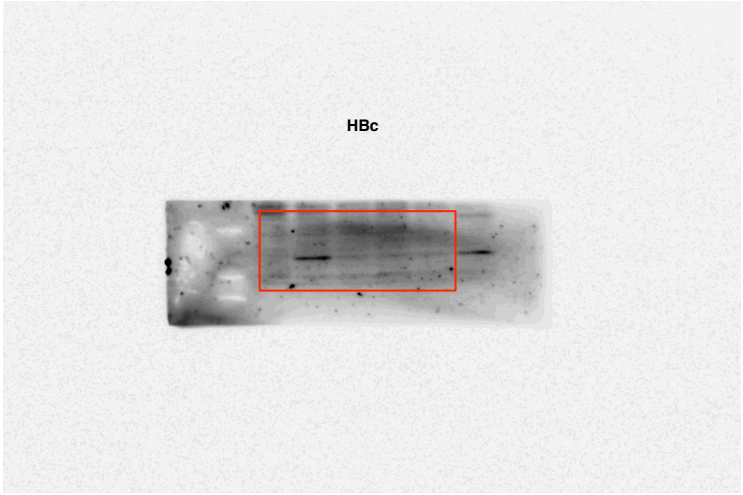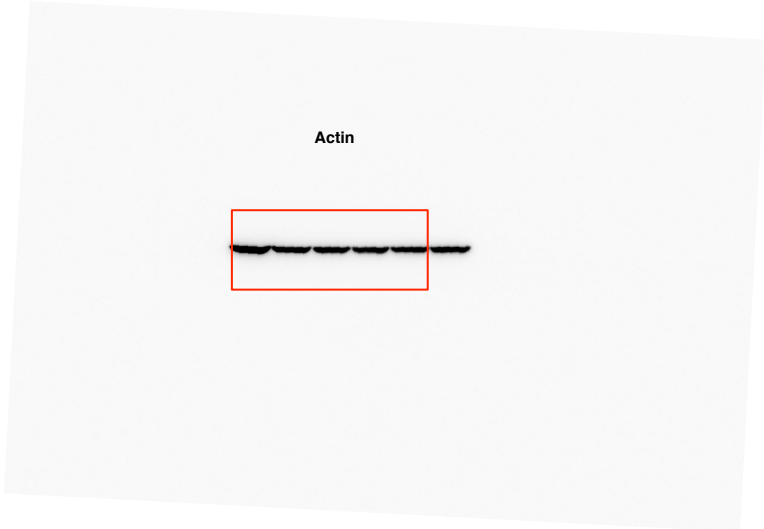

full-length blots for Fig. 3D

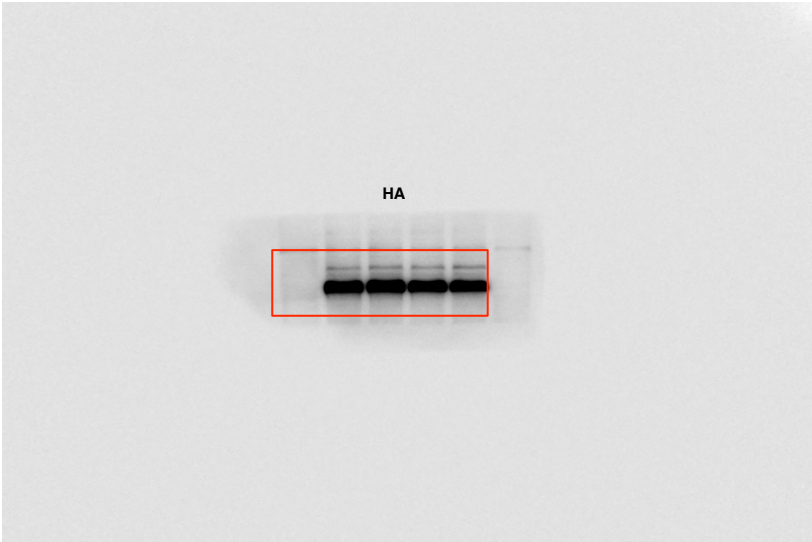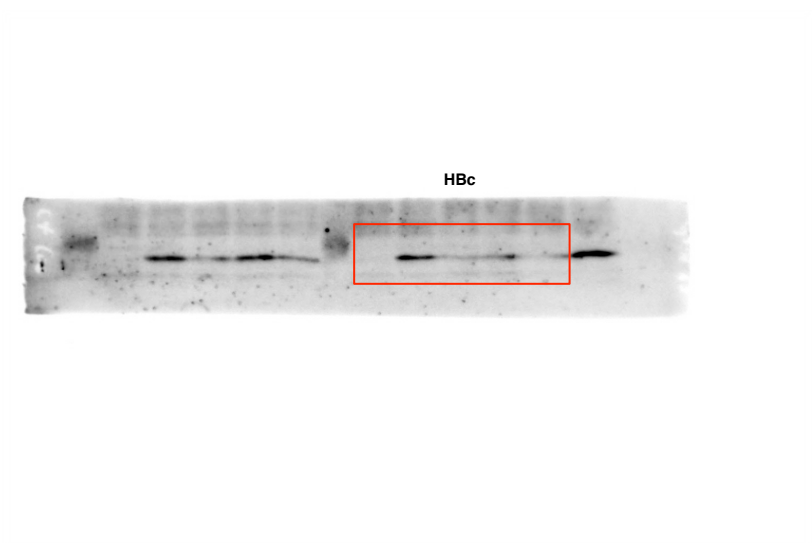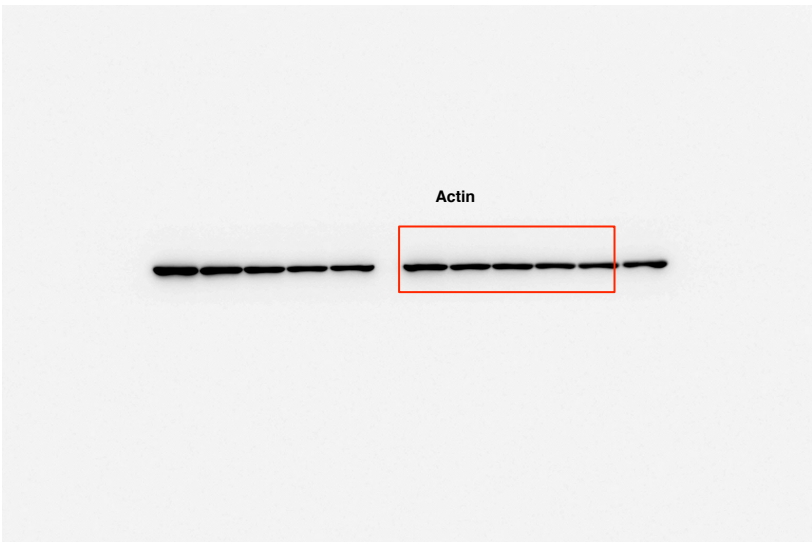



full-length blots for Fig. 4B

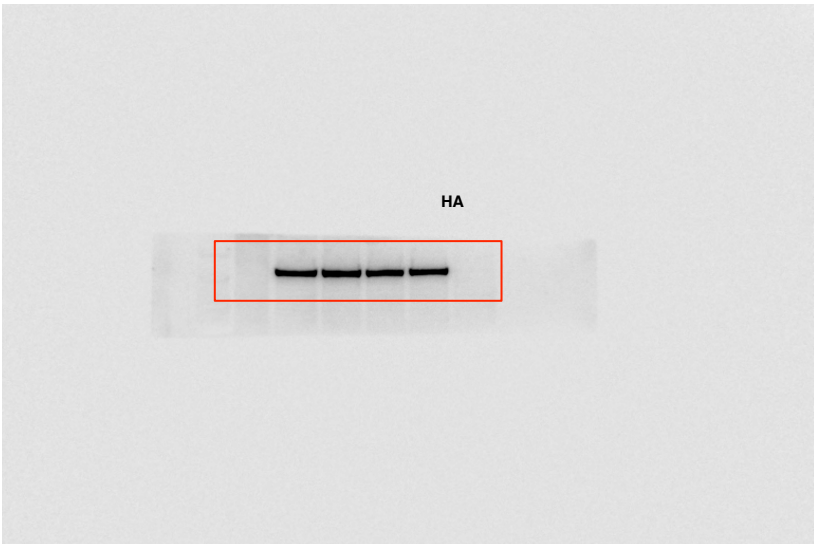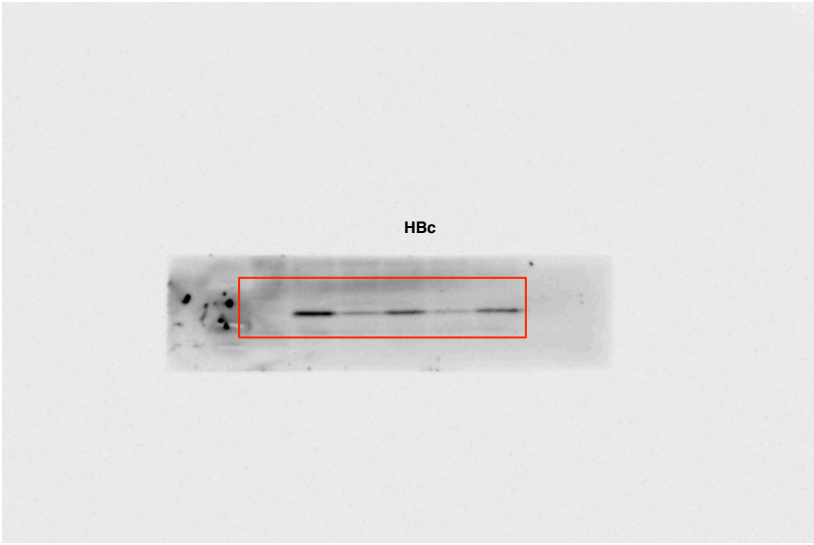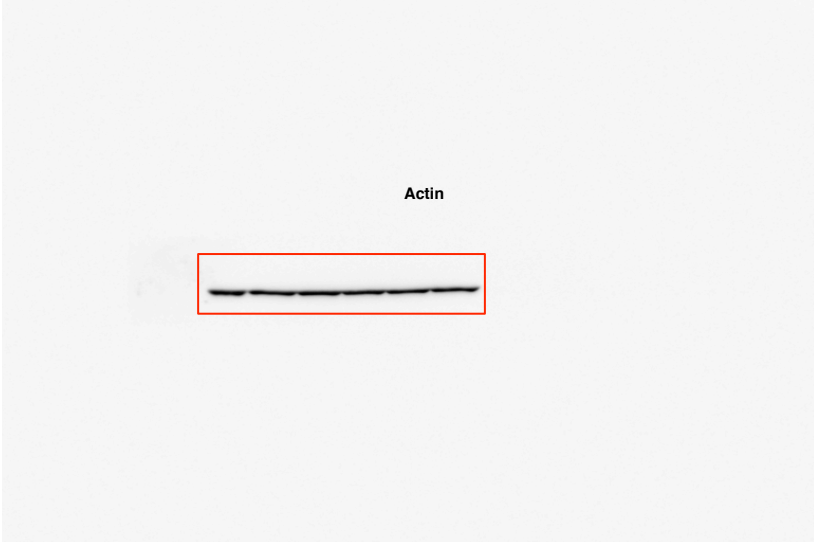

full-length blots for Fig. 4C

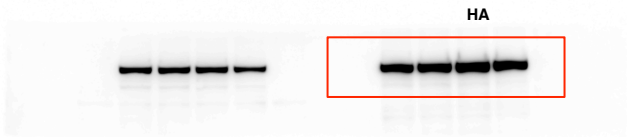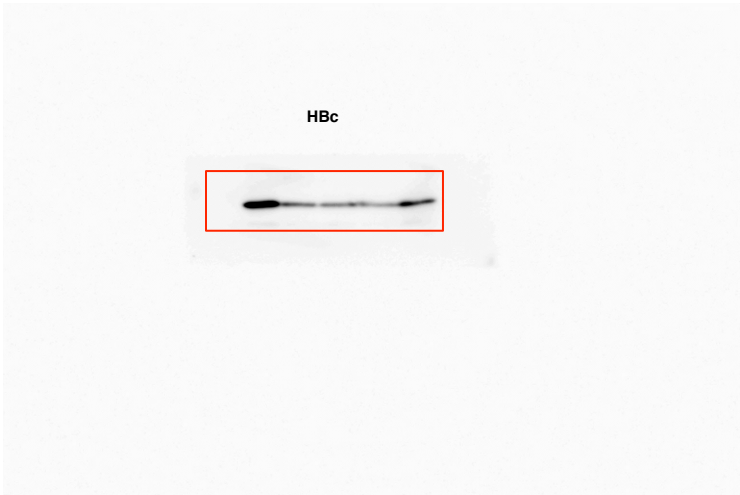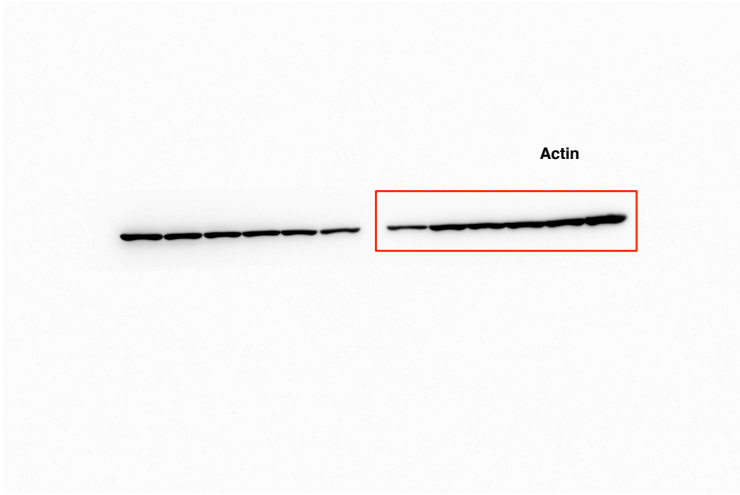

full-length blots for Fig. 4D

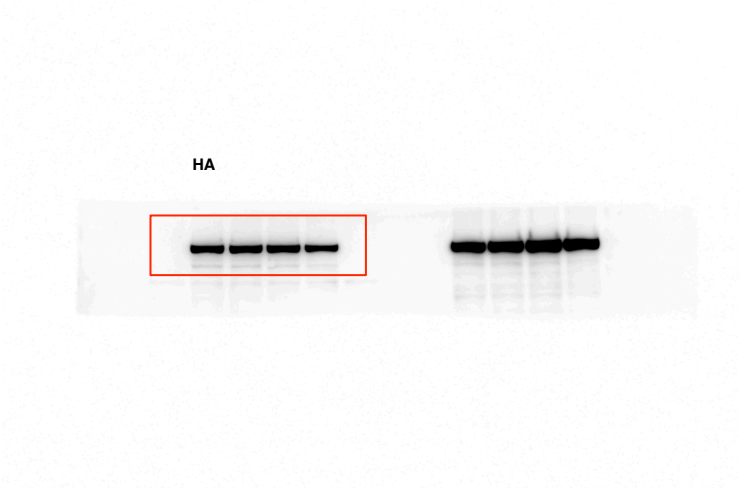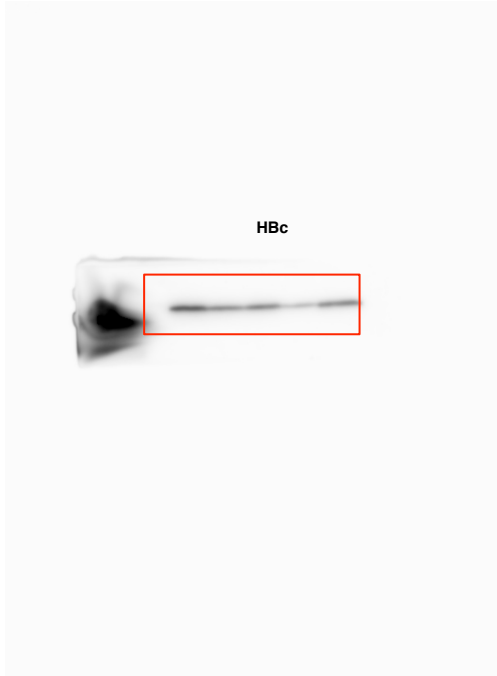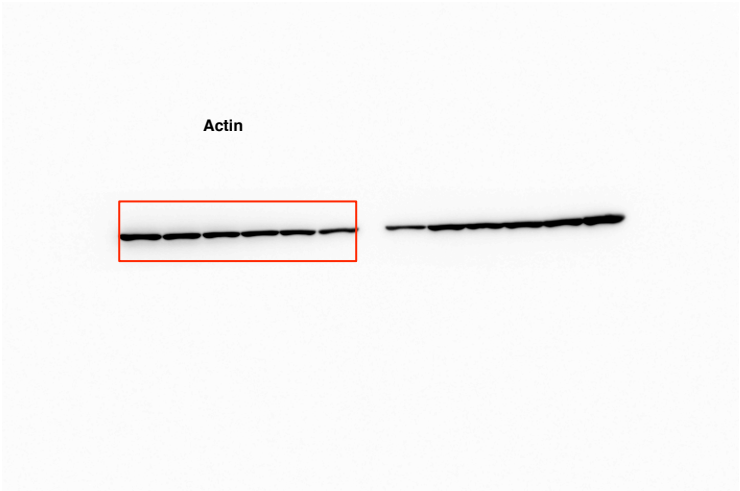

full-length blots for Fig. 4E

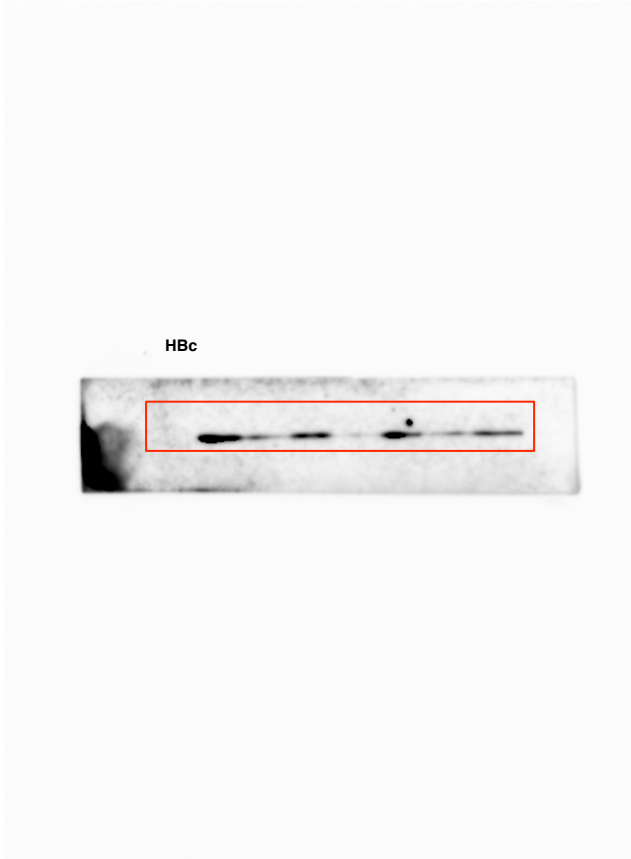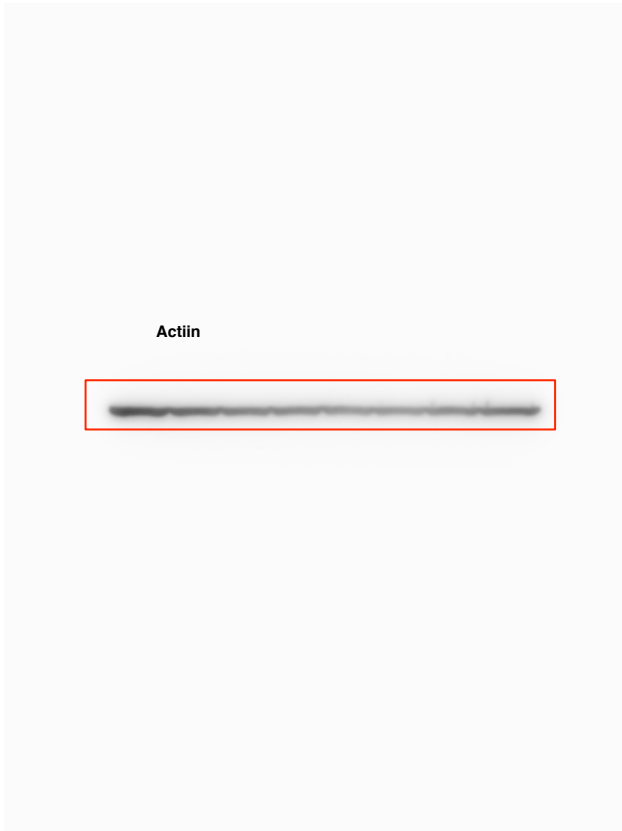

full-length blots for Fig. 5A

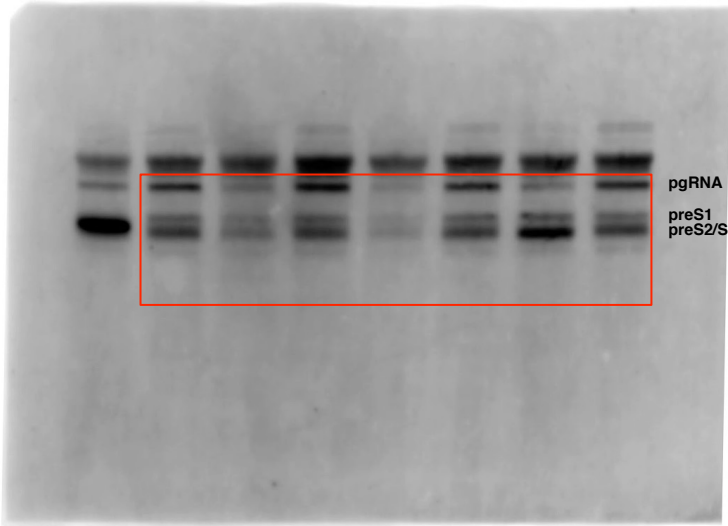

Ribosomal RNA

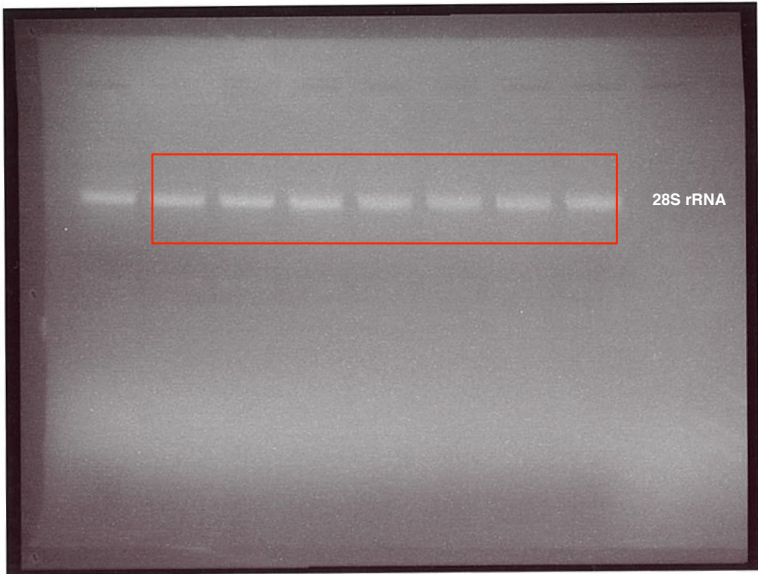

GFP Car9 Car9 Nck Nck dCas dCas sgRNA  
sgRNA sgRNA sgRNA
